# Supplementary material for: Essential roles of sphingosine-1–phosphate receptor 2 in human mast cell activation, anaphylaxis, and pulmonary edema
Source: PubMed Central journal article supplement — J Exp Med. 2010 Mar 15;207(3):465–74. doi: 10.1084/jem.20091513 (PMC2839150; doi:10.1084/jem.20091513), 2010-03-15
Supplement: supp_jem.20091513_JEM_20091513_sm.pdf [file supp_jem.20091513_JEM_20091513_sm.pdf]

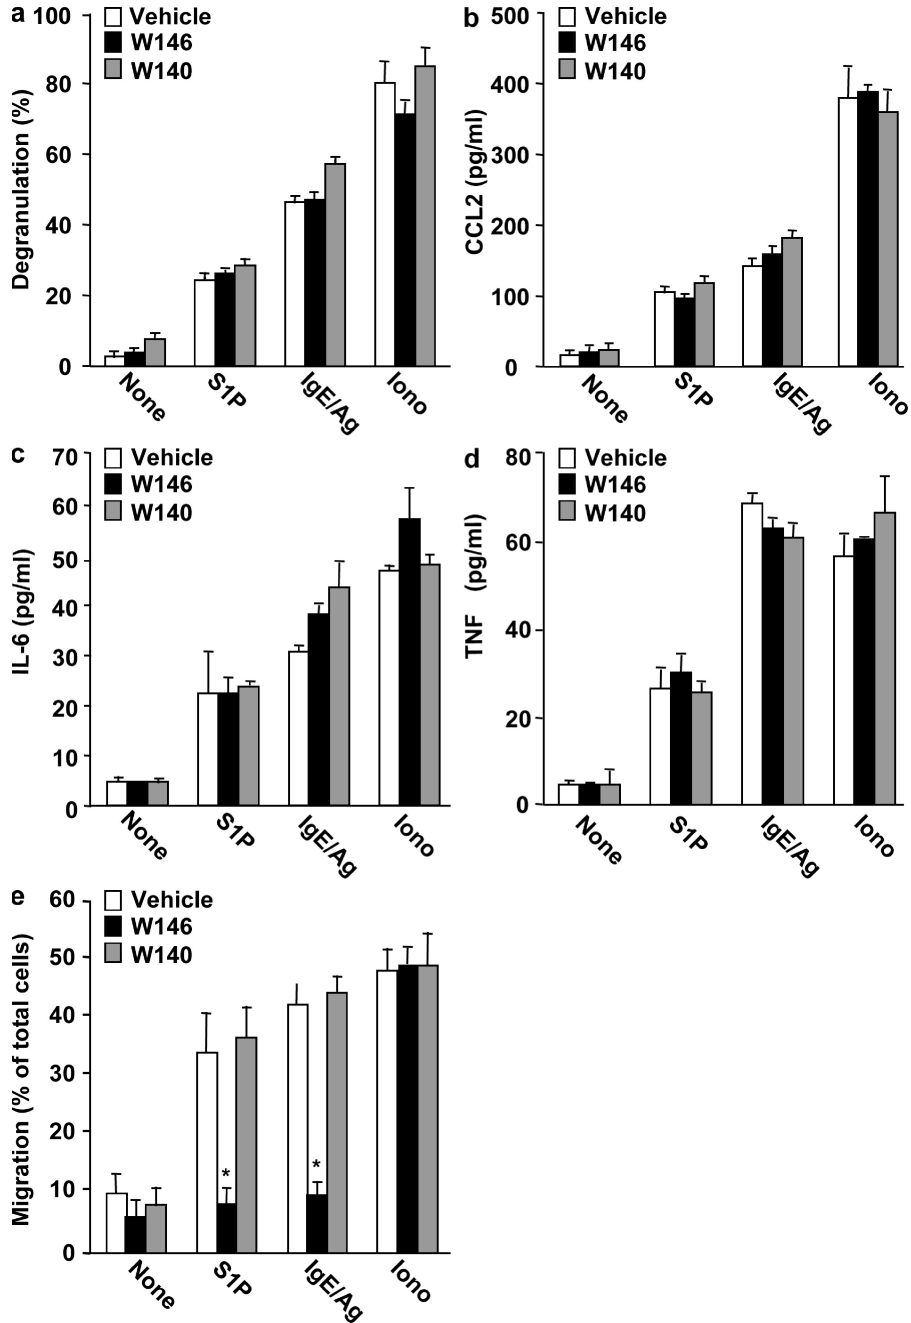

**Figure S1.** S1P<sub>1</sub> selective antagonist suppresses migration of human Sk-MCs toward S1P and Ag. Sk-MCs were stimulated with vehicle, 100 nM S1P, or 1 μM ionomycin, or sensitized overnight with IgE, and then stimulated with 30 ng/ml Ag for 2 h. Where indicated, Sk-MCs were pretreated for 30 min with vehicle, 1 μM W146, or W140 before stimulation. Degranulation (a) and secretion of CCL2 (b), IL-6 (c), and TNF (d) were measured. (e) Duplicate cultures were allowed to migrate in transwell chambers toward vehicle, 100 nM S1P, 30 ng/ml Ag, or 20 μg/ml fibronectin for 24 h. Data are expressed as the percentage of migrating cells and are the means ± SD of triplicate determinations. Similar results were obtained in three independent experiments. \*, P < 0.01.
